# Supplementary material
Source: Springer Nature journal article supplement (https://www.springermedizin.de/resource/supplementary/12887_2013_1254_MOESM5_ESM.pdf/9476054)
Supplement: MOESM5 [file 9476054]

## DISTAL INFLUENCES

### Income & Resources

#### **Evidence-based Strategies**

- ◆ Child health care access (streamlined application)<sup>1</sup>
- ◆ Child mental health program<sup>2</sup>
- ◆ Living wage ordinance<sup>3</sup>
- ◆ Tenant-based rental assistance<sup>4</sup>

#### **Intermediate Outcomes**

- ↓ Employee turnover, poverty<sup>3</sup>
- ↑ Low skill job wages<sup>3</sup>; job security<sup>8</sup>; income above poverty line, not receiving public assistance<sup>17</sup>
- Specific to children or adolescents:*
- ↑ Health insurance enrollment<sup>1</sup>

### Social Cohesion

#### **Evidence-based Strategies**

- ◆ Worksite diversity committee<sup>5</sup>
- ◆ Mentoring program<sup>6</sup>
- ◆ Neighborhood watch<sup>7</sup>
- ◆ Enhanced psychosocial work environment<sup>8</sup>

#### **Intermediate Outcomes**

- ↓ Neighborhood social disorder<sup>4</sup>
- ↑ Managerial placement of women and Blacks<sup>5</sup>

### Physical Environment

#### **Evidence-based Strategies**

- ◆ Alcohol outlet density<sup>9</sup>
- ◆ Street lighting<sup>10</sup>
- ◆ Tobacco advertising ban<sup>11</sup>
- ◆ Urban design policy<sup>12</sup>

#### **Intermediate Outcomes**

- ↓ Traffic crashes<sup>10</sup>

## PROXIMAL INFLUENCES

### Family Influences

#### **Evidence-based Strategies**

- ◆ Access to affordable quality childcare<sup>13</sup>
- ◆ Home visiting program<sup>14</sup>
- ◆ Home safety education<sup>15</sup>
- ◆ Parents involvement in child's education<sup>16</sup>

#### **Intermediate Outcomes**

- ↑ Functioning smoke alarm<sup>15</sup>
- Specific to children or adolescents:*
- ↑ Positive mother behavior<sup>14</sup>; poison number accessibility, possession of syrup of ipecac, proper storage of hazards, use of socket covers, likelihood of safe hot tap water temperature, use of fitted stair gates<sup>15</sup>

### School Influences

#### **Evidence-based Strategies**

- ◆ Quality preschool & early childhood education<sup>17</sup>
- ◆ School nutrition standards<sup>18</sup>
- ◆ Sexual education & contraceptive intervention<sup>19</sup>
- ◆ Volunteer tutor program<sup>20</sup>

#### **Intermediate Outcomes**

- Specific to children or adolescents:*
- ↑ Health screenings<sup>17</sup>; fruit/vegetable availability, fruit/vegetable intake<sup>18</sup>
- ↓ Saturated/total fat intake, saturated/total fat on menu<sup>18</sup>

### Peer Influences

#### **Evidence-based Strategies**

- ◆ After-school program that promotes personal and social skills<sup>21</sup>
- ◆ School-based efforts to reduce bullying<sup>22</sup>

#### **Intermediate Outcomes**

- Specific to children or adolescents:*
- ↑ School bonding<sup>21</sup>
- ↓ Bullying<sup>22</sup>

## PRIMARY OUTCOMES

### Cognitive Development

*Specific to children or adolescents:*

- ↑ Academic achievement<sup>6,16,17,21</sup>; IQ<sup>13,17</sup>; school readiness, test scores<sup>17</sup>; reading, writing, oral skill<sup>20</sup>
- ↓ Grade retention, special education<sup>13,17</sup>

### Social/Emotional Competence

↑ Work-life balance<sup>8</sup>; employment, home ownership<sup>17</sup>

*Specific to children or adolescents:*

- ↑ High school graduation<sup>17</sup>; HIV/AIDS knowledge<sup>19</sup>; behavioral control, positive self-perceptions<sup>21</sup>

### Absence of Psychological & Behavioral Problems

↓ Victimization<sup>4,22</sup>; crime<sup>7,9,10</sup>; stress<sup>8</sup>; alcohol consumption, interpersonal violence<sup>9</sup>; physical activity<sup>12</sup>; arrests<sup>13</sup>

↑ Mental health<sup>8</sup>

*Specific to children or adolescents:*

- ↓ Conduct disorder, depression<sup>2</sup>; aggression, delinquency<sup>6,21</sup>; tobacco use<sup>11</sup>; arrests<sup>17</sup>; risky sexual behavior<sup>19</sup>; drug use<sup>21</sup>

### Physical Health

↑ Employee health<sup>8</sup>

↓ Injury<sup>8,9,10</sup>

*Specific to children or adolescents:*

- ↓ Teen pregnancy<sup>17,19</sup>; saturated/total fat intake<sup>18</sup>
